# Supplementary material for: Effect of Ca2+ ion co-doping on radiative properties via tuning the local symmetry around the Eu3+ ions in orange red light emitting GdPO4:Eu3+ phosphors
Source: Royal Society of Chemistry journal article supplement (doi:10.1039/c8nj04372h), 2018-11-12
Supplement: c8nj04372h1.pdf [file c8nj04372h1.pdf]

## Supplementary data

**Effect of Ca<sup>2+</sup>-ion co-doping on radiative properties via tuning the  
local symmetry around the Eu<sup>3+</sup> ions in orange red light emitting**

### **GdPO<sub>4</sub>:Eu<sup>3+</sup> phosphors**

Pramod Halappa, Balaji Devakumar and C. Shivakumara\*

*Solid State and Structural Chemistry Unit,*

*Indian Institute of Science, Bangalore 560012, India.*

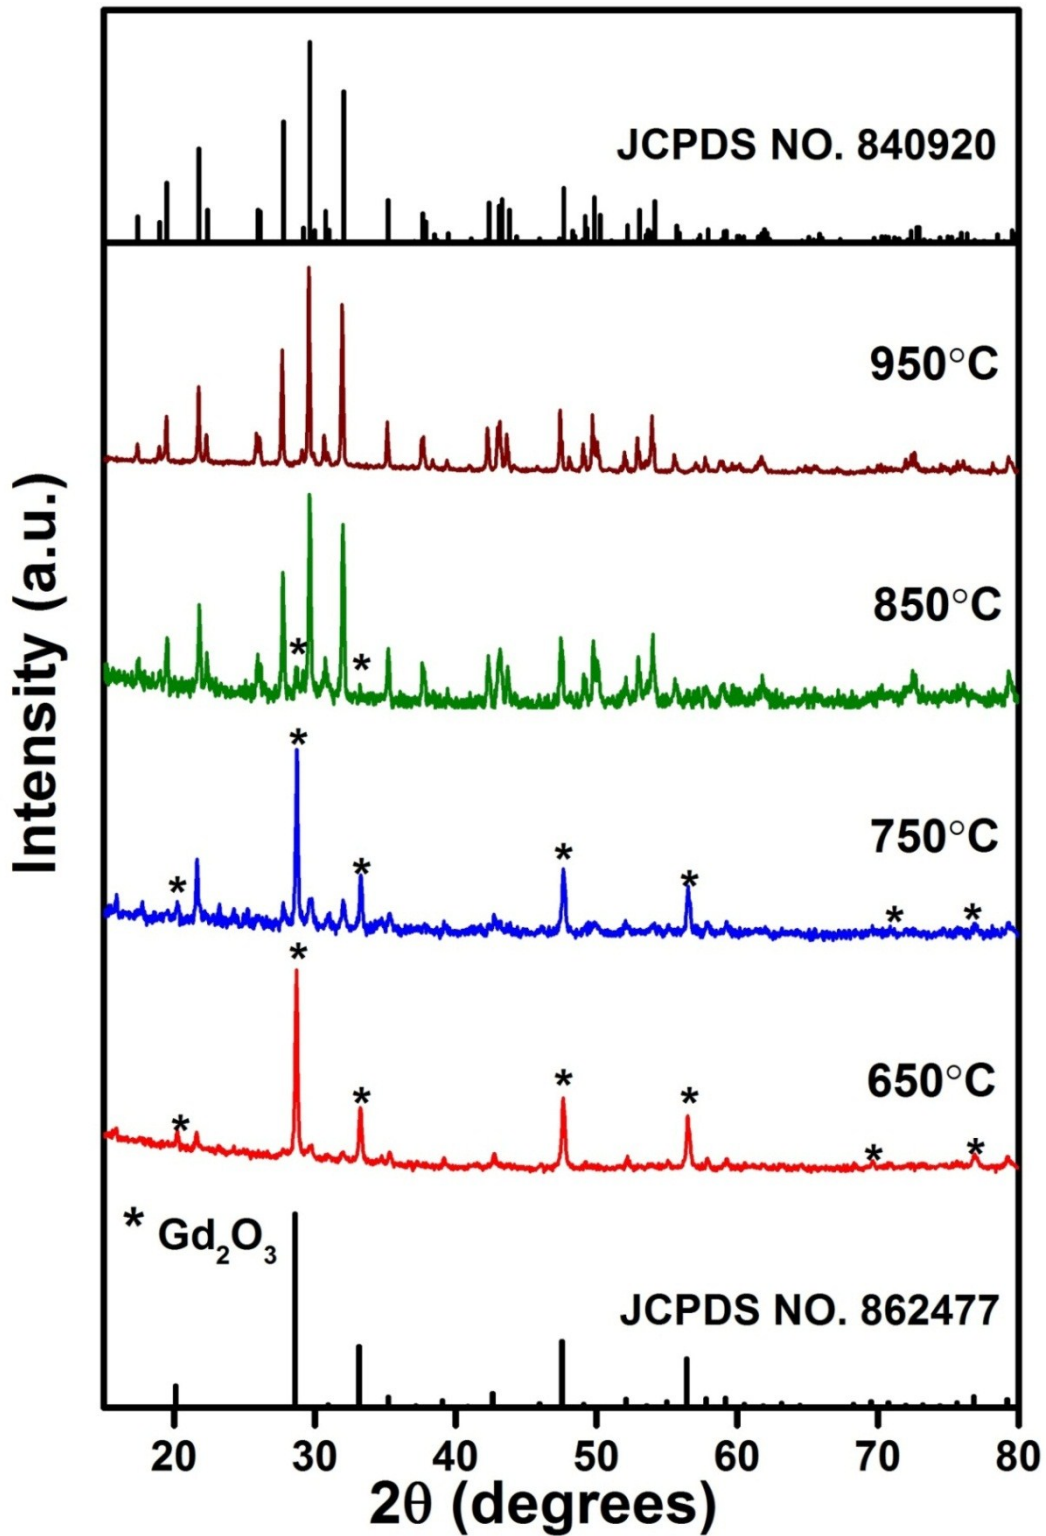

Fig. S1. Powder X-ray diffraction patterns of  $\text{Gd}_{0.93}\text{Eu}_{0.07}\text{PO}_4$  phosphor calcined at different temperatures for 12 h.

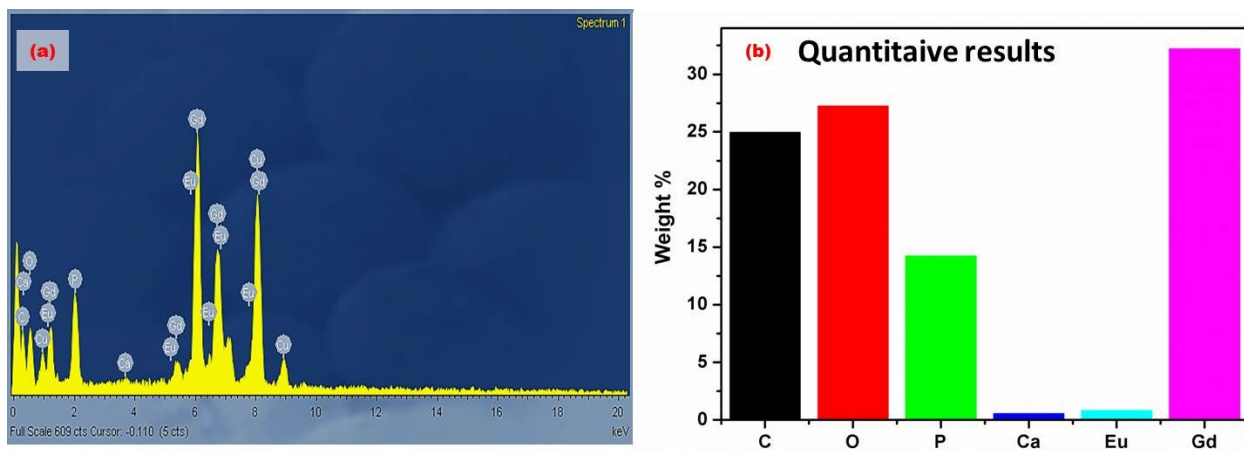

**Fig. S2.** EDX Spectra of  $\text{Gd}_{0.86}\text{Eu}_{0.07}\text{Ca}_{0.07}\text{PO}_4$  phosphors.

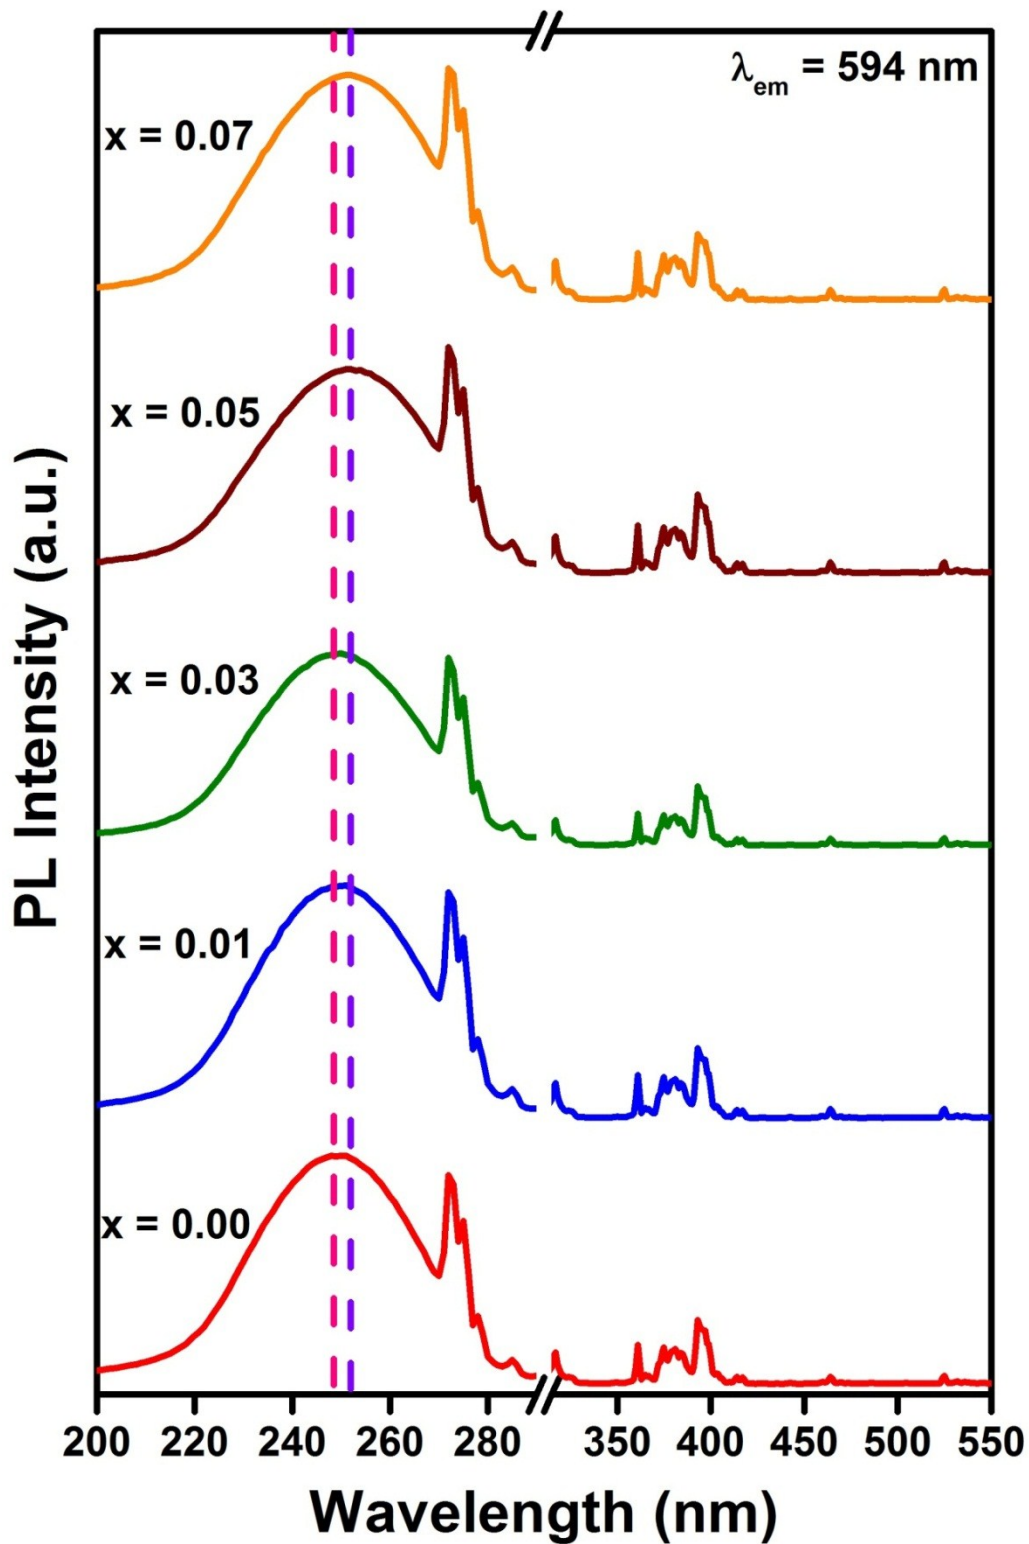

Fig.S3. Photoluminescence excitation spectra of  $\text{Gd}_{0.93-x}\text{Eu}_{0.07}\text{Ca}_x\text{PO}_4$  phosphors prepared at 950 °C 12 h.

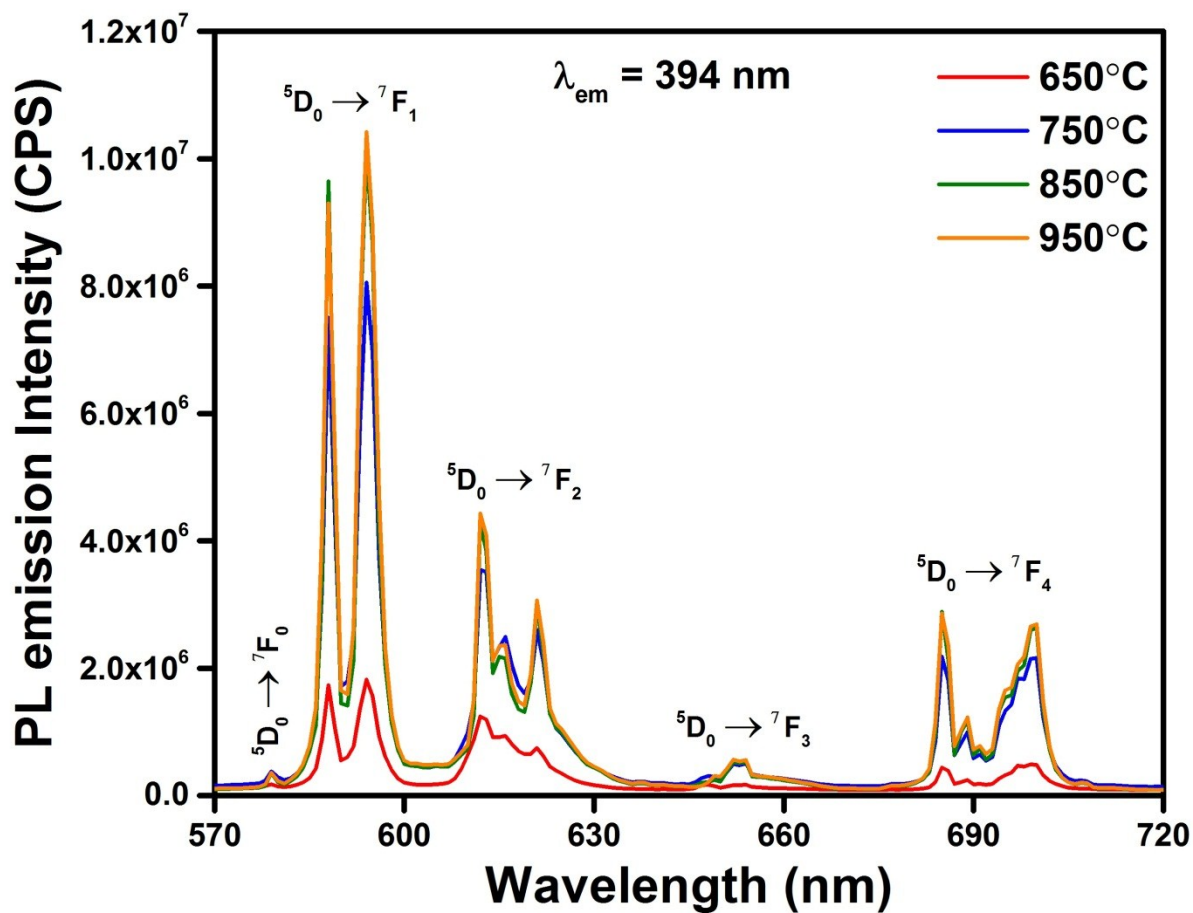

Fig. S4. Photoluminescence emission spectra for  $\text{Gd}_{0.93}\text{Eu}_{0.07}\text{PO}_4$  ( $\lambda_{ex} = 394 \text{ nm}$ ) phosphors prepared at different temperature.

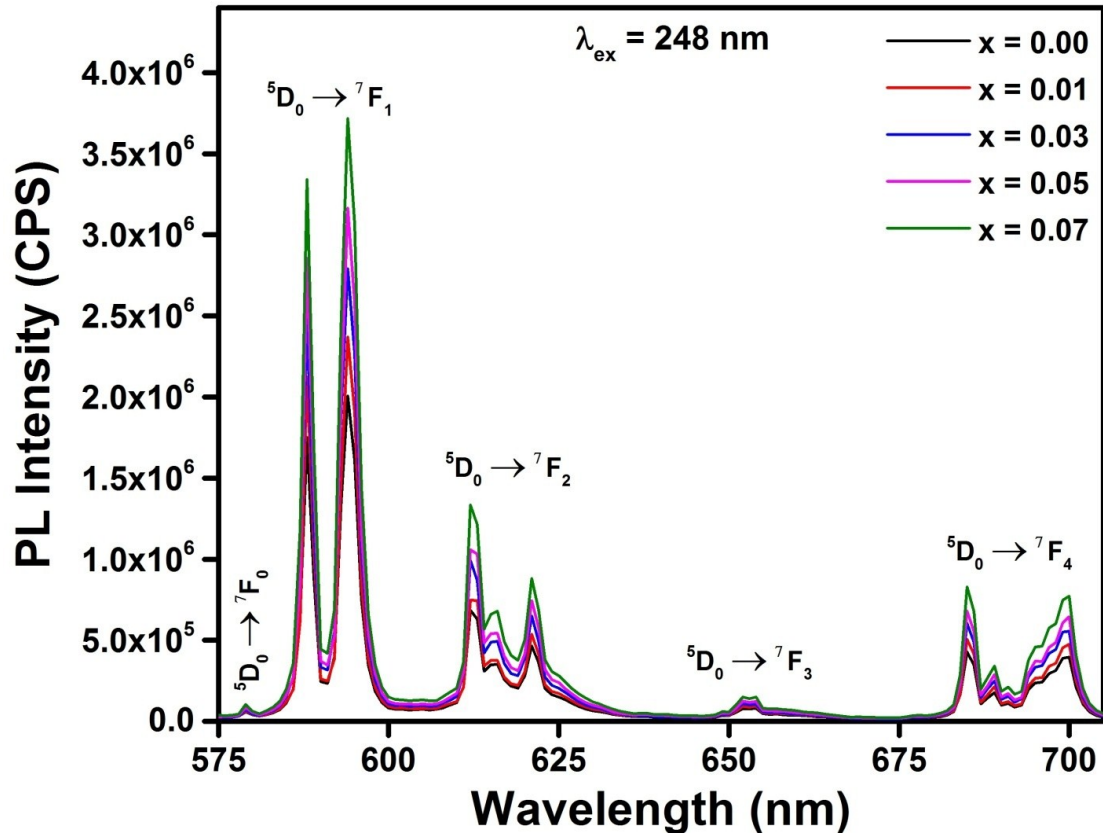

Fig. S5. Photoluminescence emission spectra of the  $Gd_{0.93-x}Eu_{0.07}Ca_xPO_4$  phosphors recorded at  $\lambda_{ex} = 248$  nm.

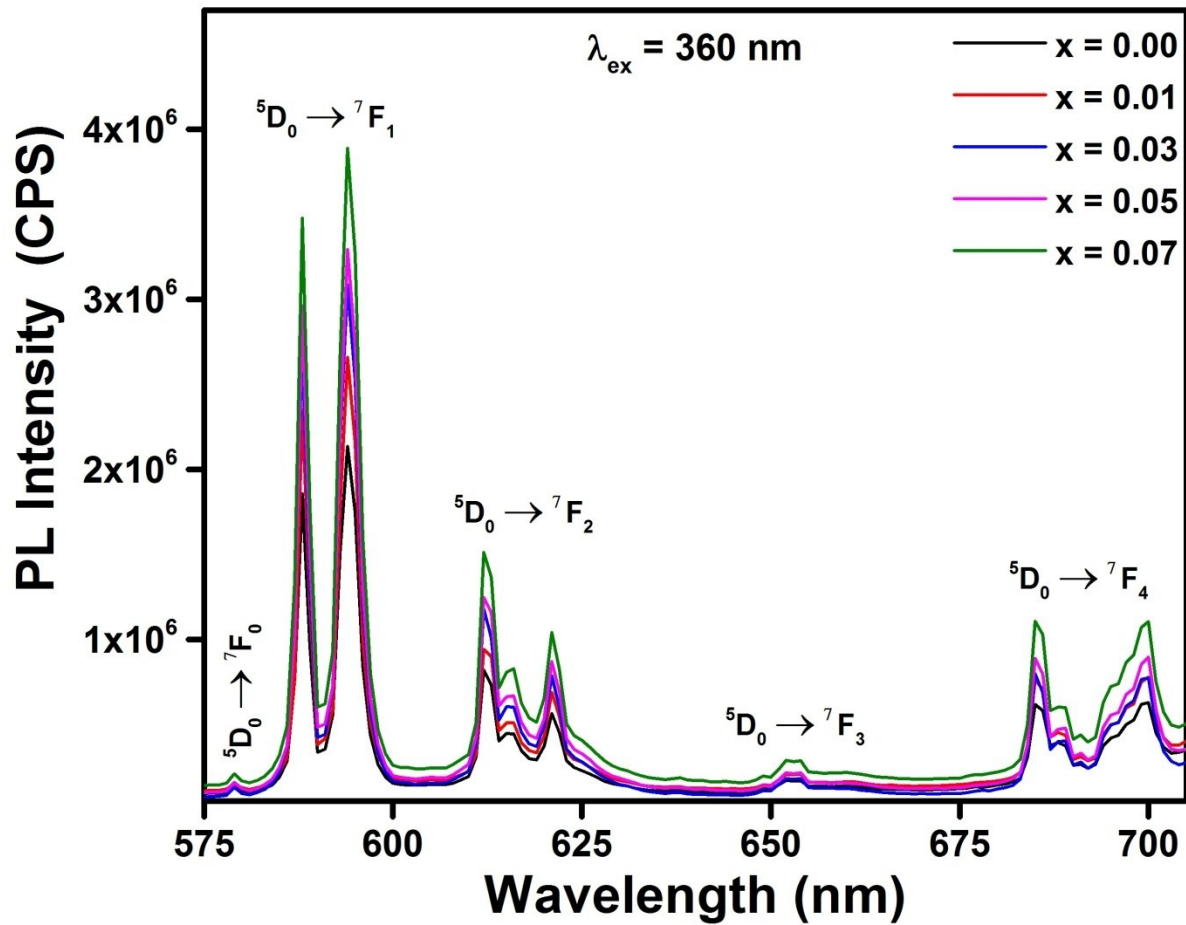

**Fig. S6.** Photoluminescence emission spectra of the  $\text{Gd}_{0.93-x}\text{Eu}_{0.07}\text{Ca}_x\text{PO}_4$  phosphors recorded at  $\lambda_{\text{ex}} = 360 \text{ nm}$ .

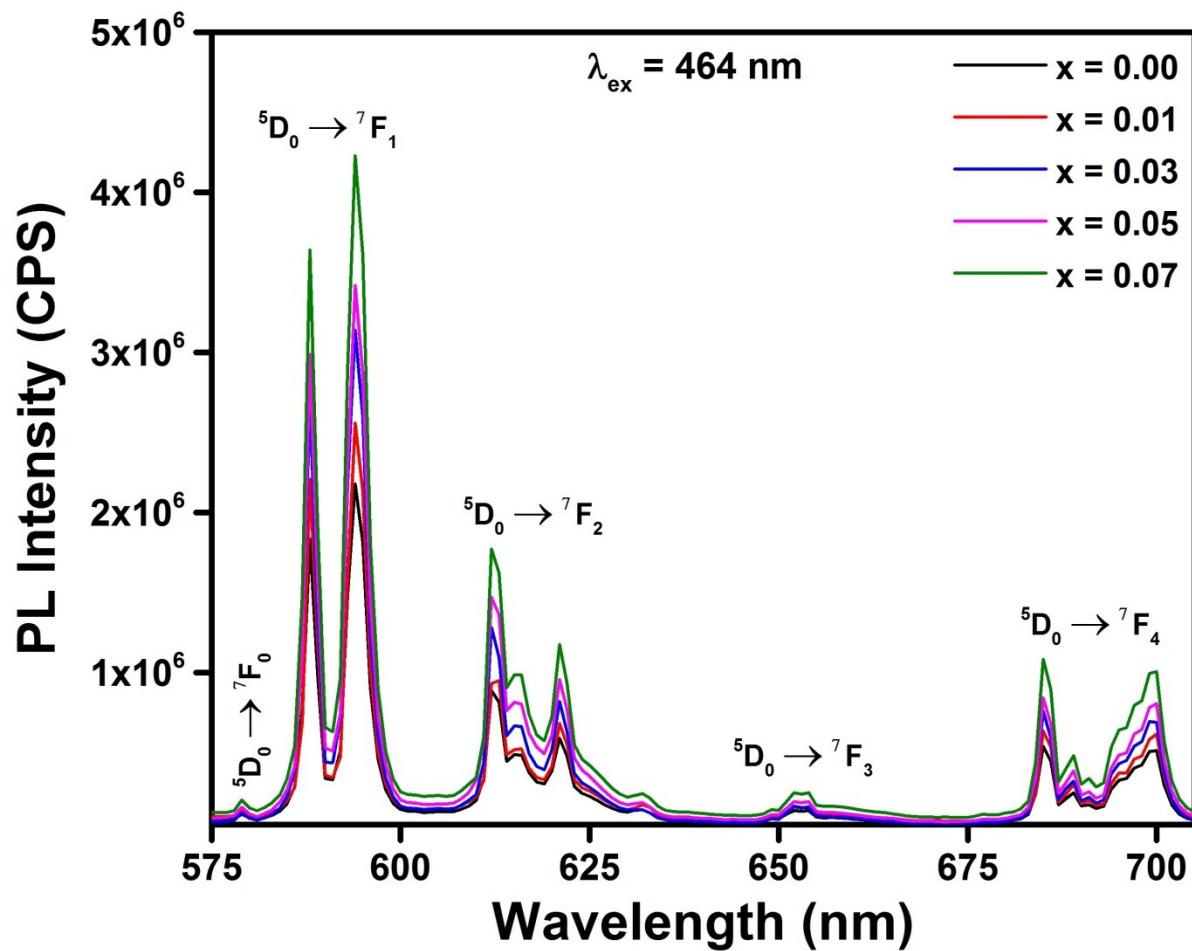

Fig. S7. Photoluminescence emission spectra of  $\text{Gd}_{0.93-x}\text{Eu}_{0.07}\text{Ca}_x\text{PO}_4$  phosphors recorded at  $\lambda_{\text{ex}} = 464 \text{ nm}$ .



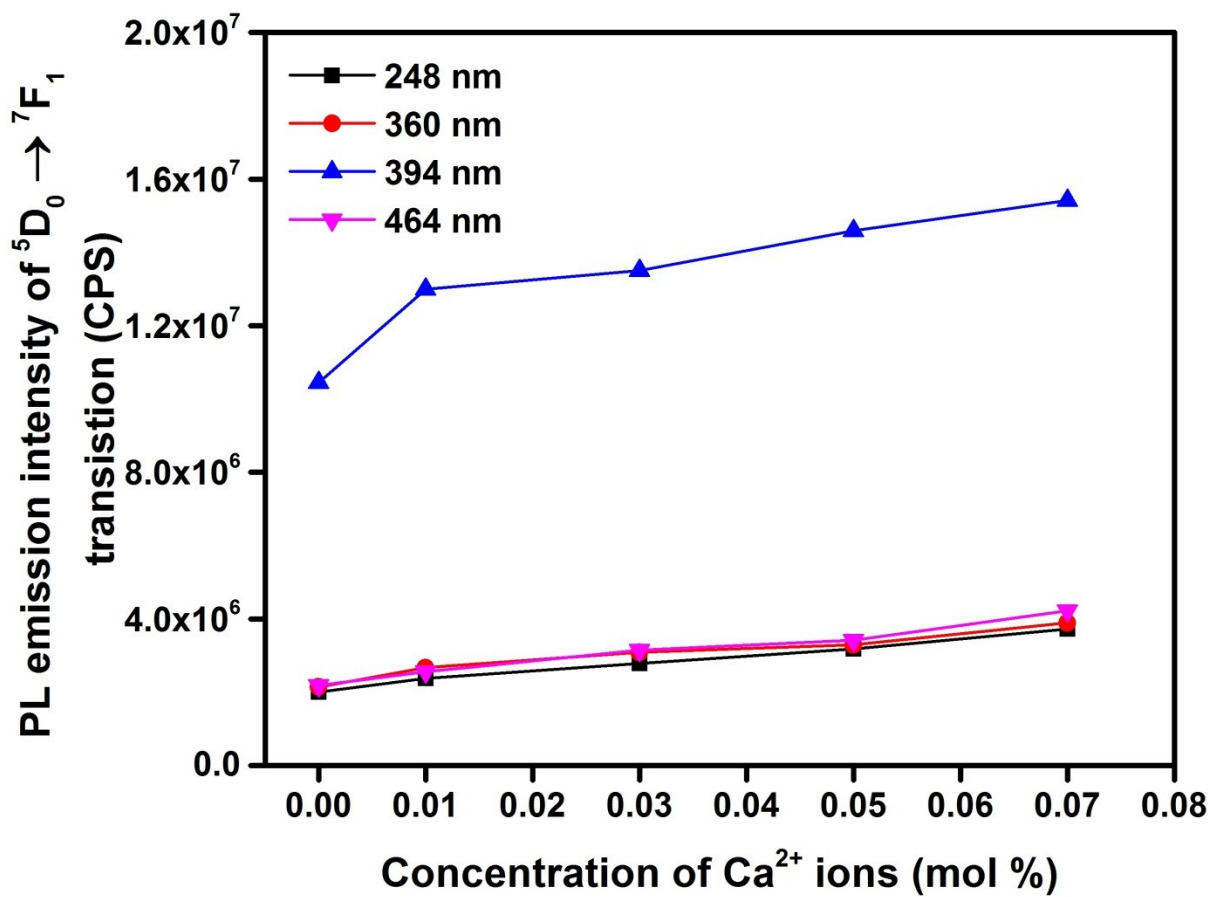

Fig. S8. Variation of emission intensity of  ${}^5D_0 \rightarrow {}^7F_1$  peaks as a function of  $Ca^{2+}$  ions concentration at different excitation wavelengths.

**Table S1.** Rietveld refined structural parameters for  $\text{Gd}_{0.93-x}\text{Eu}_{0.07}\text{Ca}_x\text{PO}_4$  ( $0.00 \leq x \leq 0.07$ ) phosphors.

| Ca <sup>2+</sup> content                             | Ca <sup>2+</sup> (0 mol%) | Ca <sup>2+</sup> (1 mol%)  | Ca <sup>2+</sup> (3 mol%) | Ca <sup>2+</sup> (5 mol%) | Ca <sup>2+</sup> (7 mol%) |
|------------------------------------------------------|---------------------------|----------------------------|---------------------------|---------------------------|---------------------------|
| Crystal System                                       | Monoclinic                | Monoclinic                 | Monoclinic                | Monoclinic                | Monoclinic                |
| Space group                                          | P12 <sub>1/n</sub> 1 (14) | P 12 <sub>1/n</sub> 1 (14) | P12 <sub>1/n</sub> 1 (14) | P12 <sub>1/n</sub> 1 (14) | P12 <sub>1/n</sub> 1 (14) |
| Lattice Parameters                                   |                           |                            |                           |                           |                           |
| <i>a</i> (Å)                                         | 6.653(2)                  | 6.654(3)                   | 6.654(3)                  | 6.655(3)                  | 6.655(2)                  |
| <i>b</i> (Å)                                         | 6.850(1)                  | 6.847(2)                   | 6.848(4)                  | 6.848(2)                  | 6.849(3)                  |
| <i>c</i> (Å)                                         | 6.339(2)                  | 6.339(1)                   | 6.340(3)                  | 6.341(2)                  | 6.341(2)                  |
| Cell volume (Å <sup>3</sup> )                        | 280.02(7)                 | 280.21(2)                  | 280.33(1)                 | 280.38(2)                 | 280.43(7)                 |
| β (°)                                                | 103.99(7)                 | 104.00(2)                  | 104.01(5)                 | 104.02(1)                 | 104.02(2)                 |
| Atomic positions                                     |                           |                            |                           |                           |                           |
| Gd <sup>3+</sup> /Eu <sup>3+</sup> /Ca <sup>2+</sup> | (4b)                      | (4b)                       | (4b)                      | (4b)                      | (4b)                      |
| <i>x</i>                                             | 0.2812(24)                | 0.2801(34)                 | 0.2809(44)                | 0.2818(34)                | 0.2813(35)                |
| <i>y</i>                                             | 0.1554(29)                | 0.1547(42)                 | 0.1549(53)                | 0.1552(42)                | 0.1552(42)                |
| <i>z</i>                                             | 0.0963(31)                | 0.0961(44)                 | 0.0948(58)                | 0.0952(45)                | 0.0957(45)                |
| P                                                    | (4a)                      | (4a)                       | (4a)                      | (4a)                      | (4a)                      |
| <i>x</i>                                             | 0.3030 (10)               | 0.3004(9)                  | 0.3005(18)                | 0.2987(14)                | 0.2997(23)                |
| <i>y</i>                                             | 0.1602 (11)               | 0.1614(15)                 | 0.1598(19)                | 0.1610(13)                | 0.1607(21)                |
| <i>z</i>                                             | 0.6179 (9)                | 0.6181(14)                 | 0.6213(17)                | 0.6169(11)                | 0.6153(22)                |
| O1                                                   | (16f)                     | (16f)                      | (16f)                     | (16f)                     | (16f)                     |
| <i>x</i>                                             | 0.2425(19)                | 0.2429(27)                 | 0.2350(24)                | 0.2477(25)                | 0.2465(40)                |
| <i>y</i>                                             | -0.0013(18)               | -0.0010(18)                | -0.0077(24)               | -0.0015(22)               | -0.0067(36)               |
| <i>z</i>                                             | 0.4291(23)                | 0.4275(32)                 | 0.4203(43)                | 0.4177(24)                | 0.4301(43)                |
| O2                                                   | (16f)                     | (16f)                      | (16f)                     | (16f)                     | (16f)                     |
| <i>x</i>                                             | 0.3822(13)                | 0.3812(18)                 | 0.3783(23)                | 0.3858(18)                | 0.3872(27)                |
| <i>y</i>                                             | 0.3303(20)                | 0.3261(27)                 | 0.3187(32)                | 0.3357(28)                | 0.3297(39)                |
| <i>z</i>                                             | 0.5026(19)                | 0.5038(26)                 | 0.5019(33)                | 0.5081(25)                | 0.5023(41)                |
| O3                                                   | (16f)                     | (16f)                      | (16f)                     | (16f)                     | (16f)                     |
| <i>x</i>                                             | 0.4757(16)                | 0.4688(22)                 | 0.4673(29)                | 0.4730(22)                | 0.4739(27)                |
| <i>y</i>                                             | 0.1045(15)                | 0.1071(21)                 | 0.1055(33)                | 0.1009(19)                | 0.1019(20)                |

|                               |            |            |            |            |            |
|-------------------------------|------------|------------|------------|------------|------------|
| $z$                           | 0.8113(16) | 0.8096(22) | 0.8070(31) | 0.8133(23) | 0.8160(23) |
| O4                            | (16f)      | (16f)      | (16f)      | (16f)      | (16f)      |
| $x$                           | 0.1208(17) | 0.1175(24) | 0.1138(30) | 0.1138(23) | 0.1033(23) |
| $y$                           | 0.1996(18) | 0.2023(25) | 0.1952(33) | 0.1974(25) | 0.1997(25) |
| $z$                           | 0.7144(18) | 0.7176(26) | 0.7049(31) | 0.7080(24) | 0.7073(24) |
| <b><math>R</math> Factors</b> |            |            |            |            |            |
| $R_p$                         | 1.33       | 1.65       | 1.95       | 1.63       | 1.64       |
| $R_{wp}$                      | 1.75       | 2.09       | 2.45       | 2.07       | 2.08       |
| $R_{exp}$                     | 1.58       | 2.20       | 2.53       | 2.25       | 2.25       |
| $\chi^2$                      | 1.23       | 0.90       | 0.94       | 0.84       | 0.85       |
| $R_{Bragg}$                   | 5.49       | 6.31       | 8.53       | 5.90       | 6.41       |
| $R_F$                         | 5.33       | 5.73       | 6.63       | 5.51       | 6.29       |

---
